# Supplementary material for: Assessment of Carbon Density in Natural Mountain Forest Ecosystems at Northwest China
Source: MDPI journal article supplement (doi:10.3390/ijerph18042098), 2021-02-21
Supplement: s1 [file s1]

## Supplementary Materials

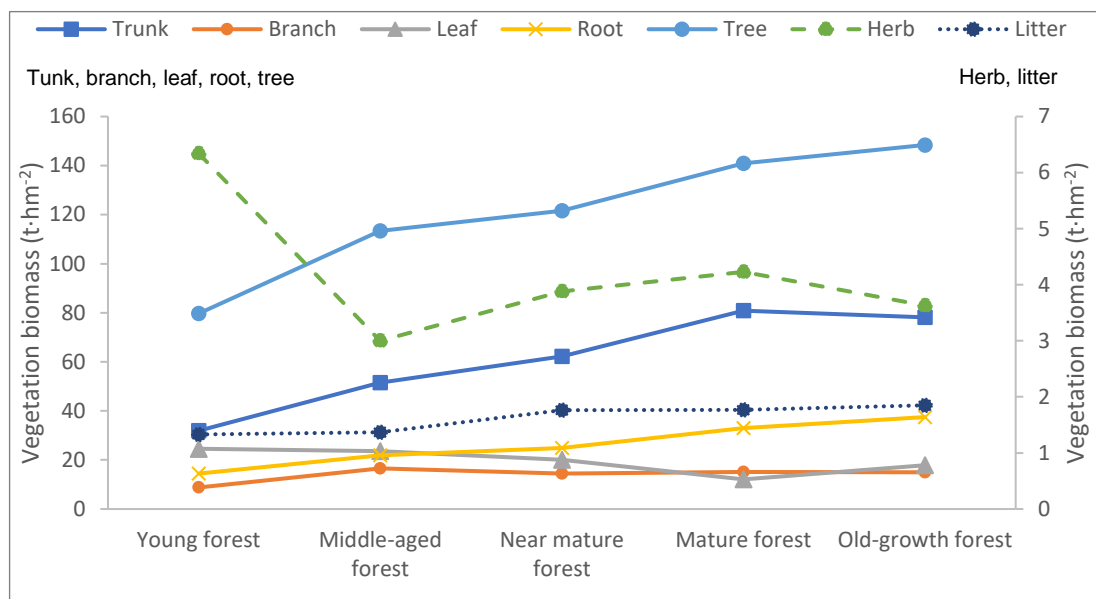

**Figure S1.** The biomass in different forest age groups.

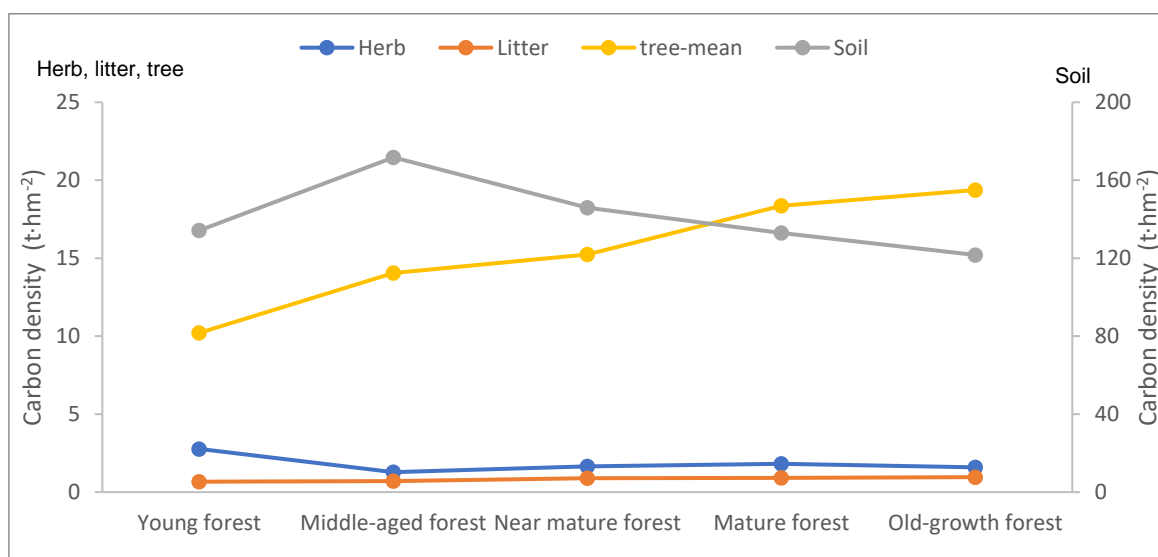

**Figure S2.** The carbon density of forest layers in different forest age groups.

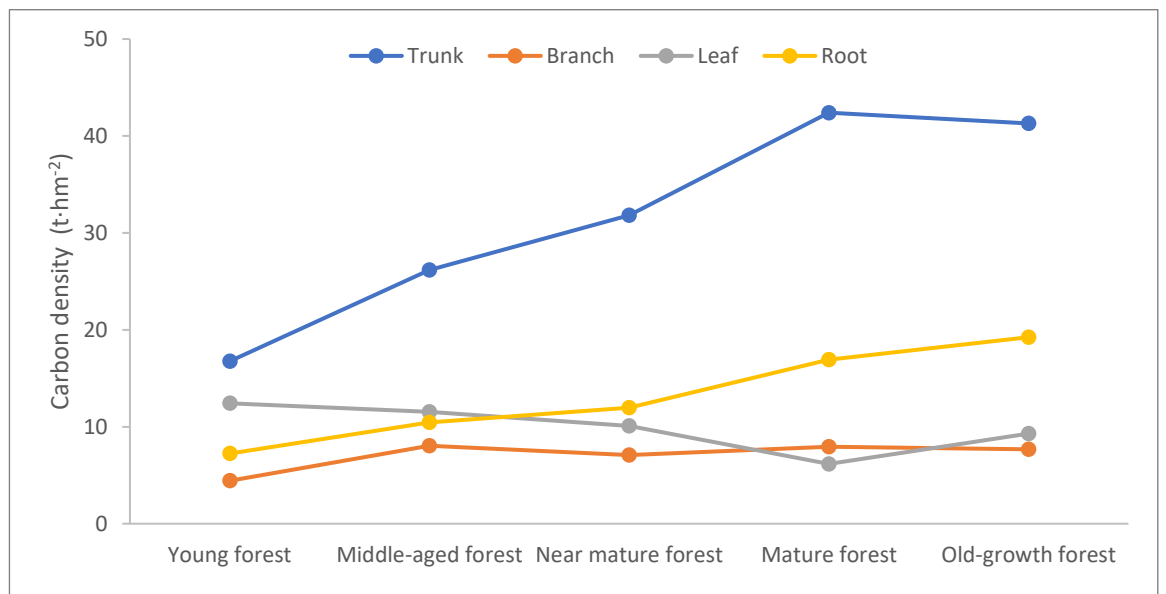

**Figure S3.** The carbon density of tree parts in different forest age groups.
